# Supplementary material
Source: MDPI journal article supplement (https://www.mdpi.com/2072-4292/15/12/2985)
Supplement: s1 [file s1]

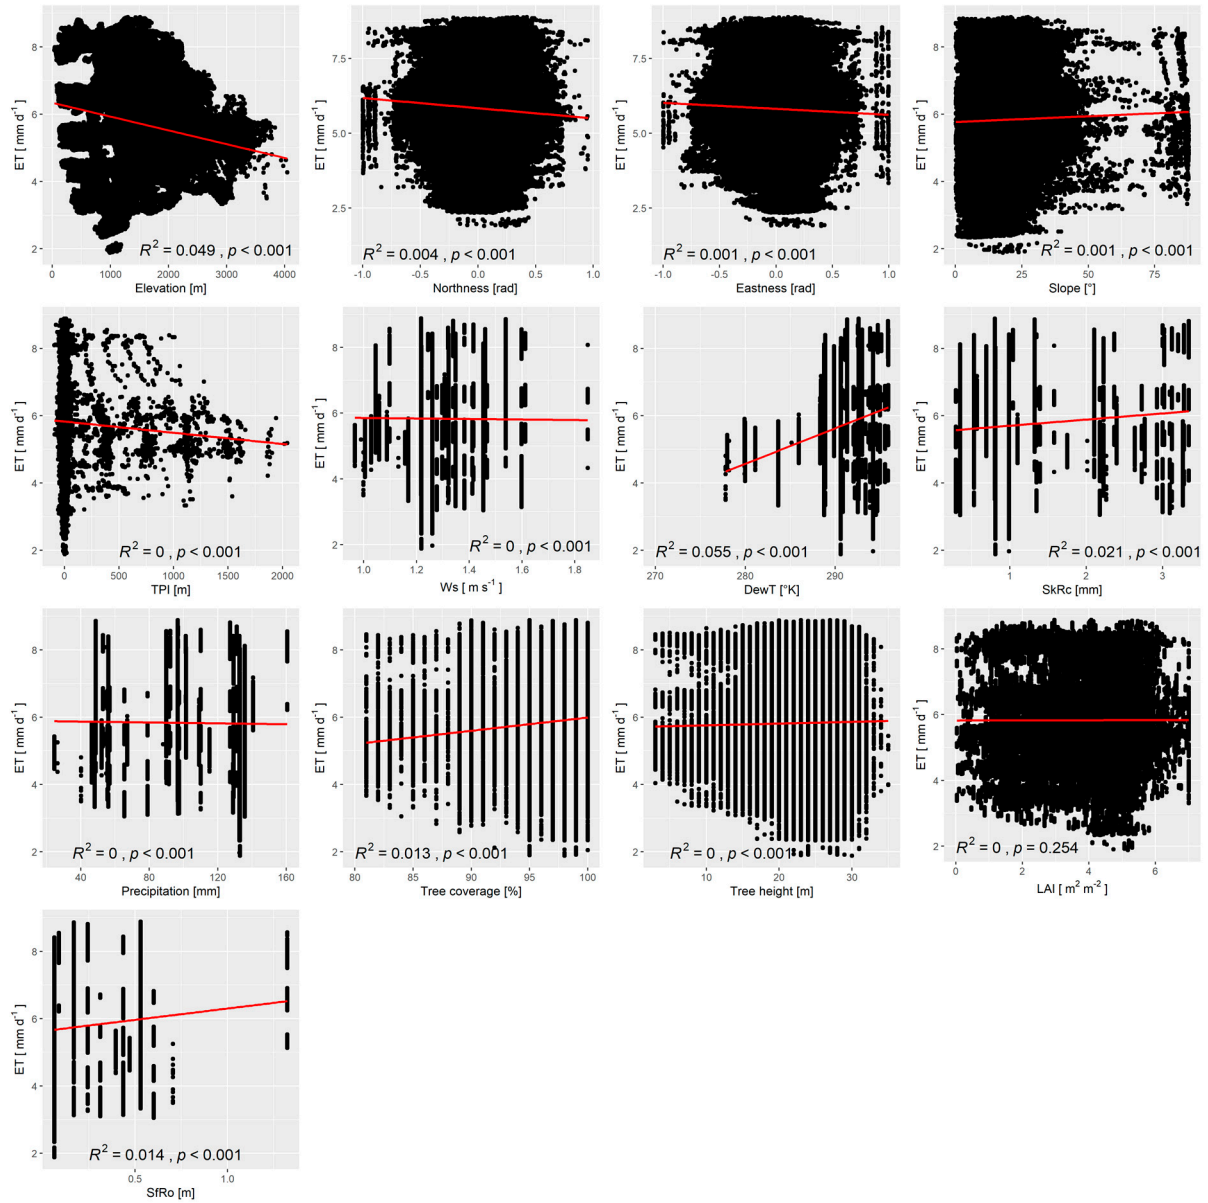

**Figure S1.** Relationship between ET as retrieved from ECOSTRESS L3 ET product and all 13 predictor variables - before forward feature selection (FFS)- for D1: 06 February 2020. Significant linear relationships occurred in 12 out of 13 regressions, but only marginal parts of the variance in ET were explained ( $r^2$ : < 0.001 – 0.055,  $P$  < 0.05). No significant linear relationship occurred between ET and LAI.

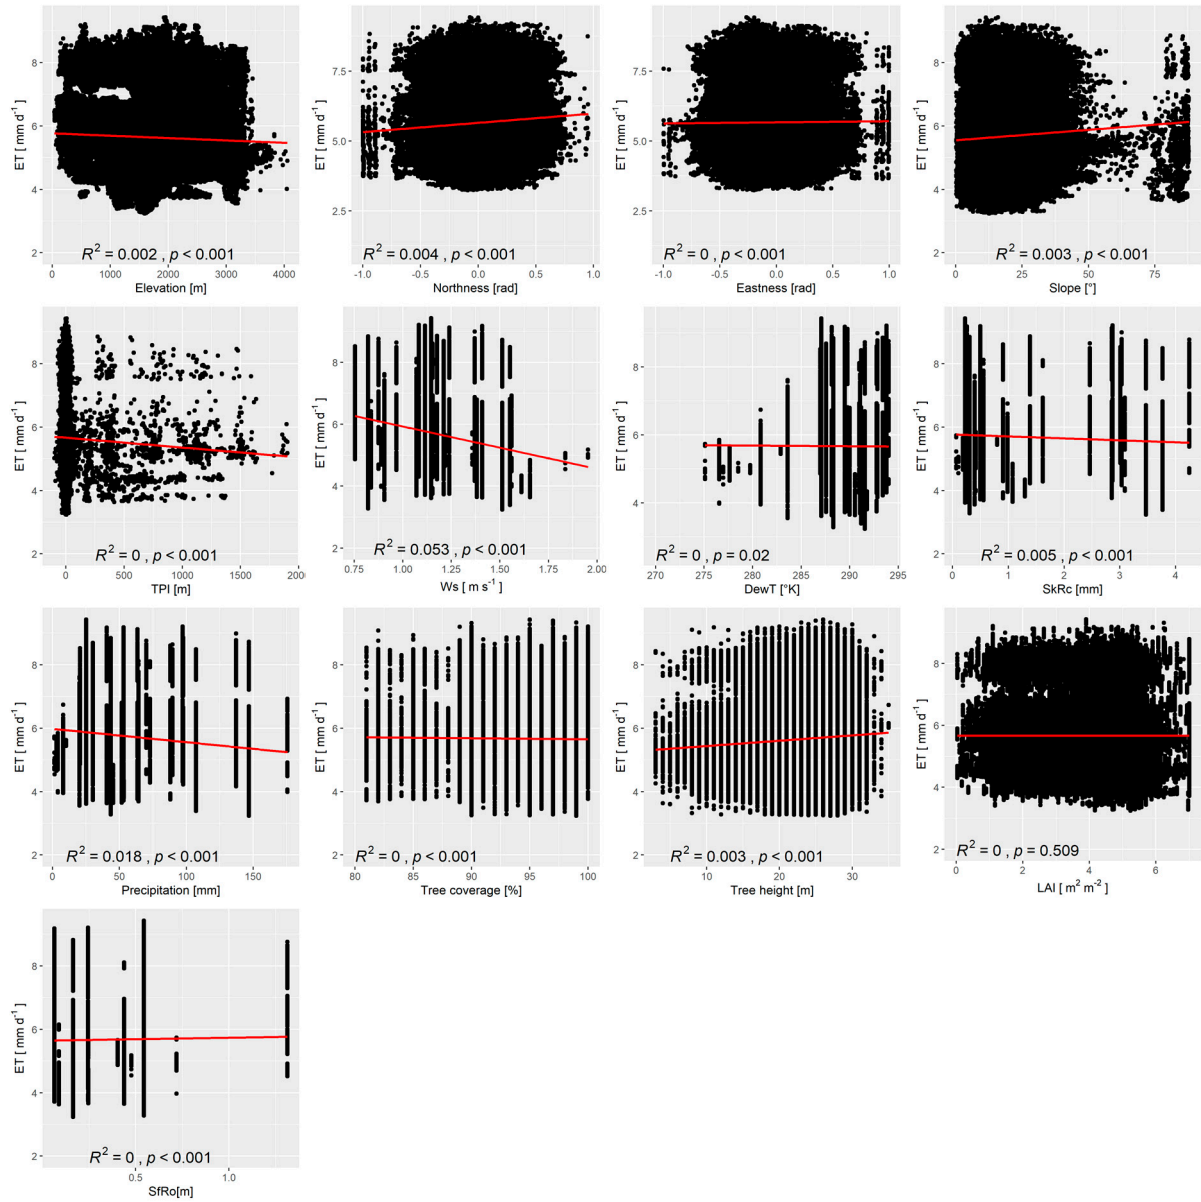

**Figure S2.** Relationship between ET as retrieved from ECOSTRESS L3 ET product and all 13 predictor variables - before forward feature selection (FFS)- for D2: 10 August 2020. Significant linear relationships occurred in 12 out of 13 regressions, but only marginal parts of the variance in ET were explained ( $r^2$ :  $< 0.001 - 0.053$ ,  $P < 0.05$ ). No significant linear relationship occurred between ET and LAI.

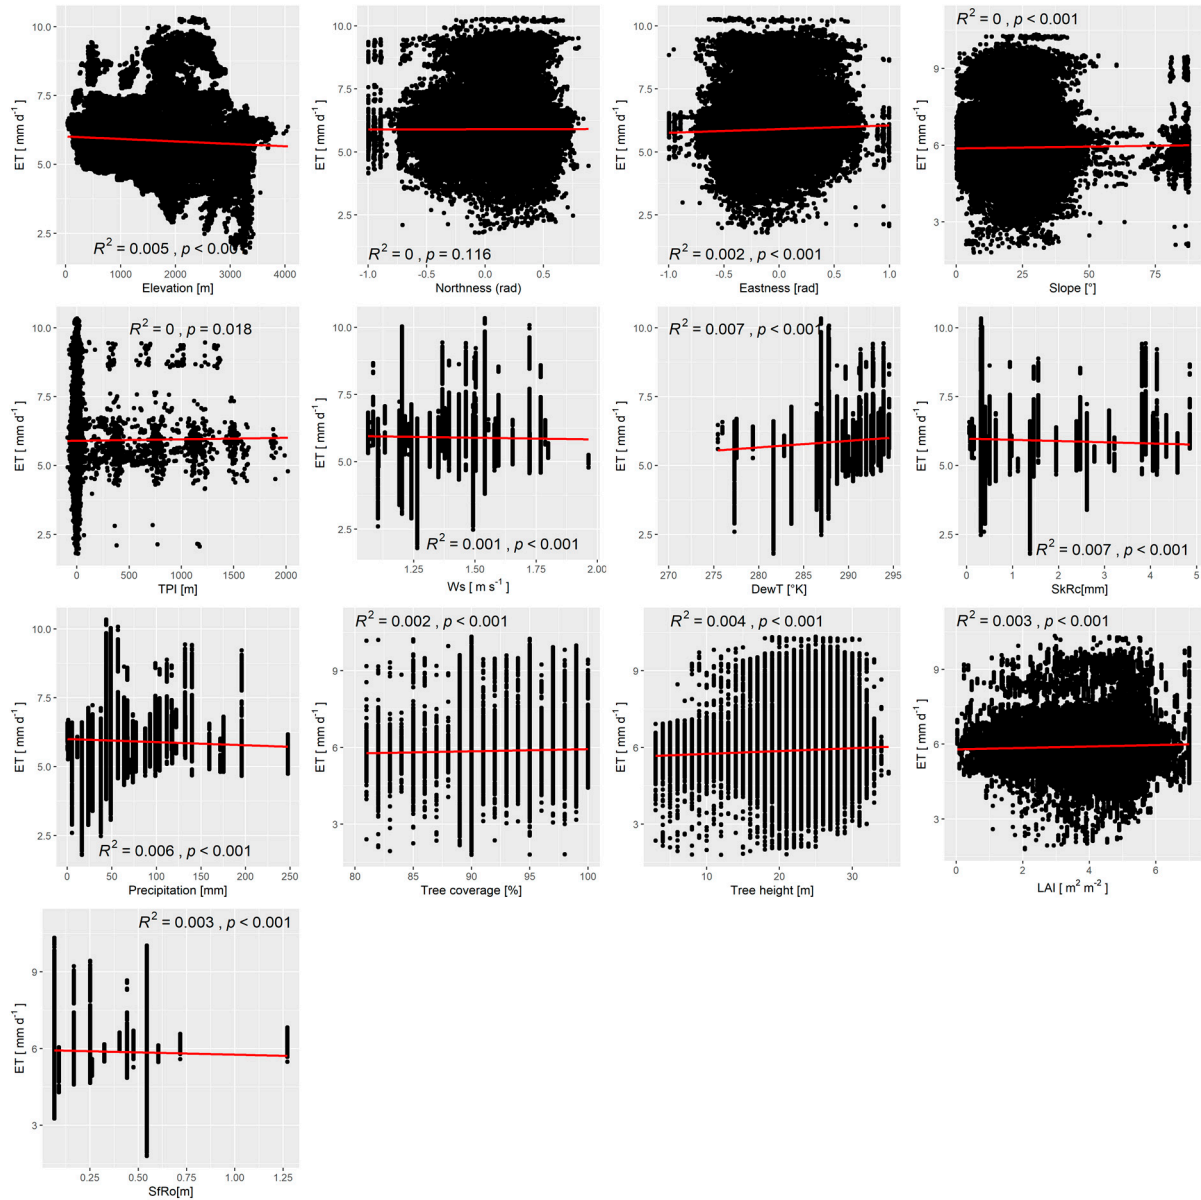

**Figure S3.** Relationship between ET as retrieved from ECOSTRESS L3 ET product and all 13 predictor variables - before forward feature selection (FFS)- for D3: 10 October 2020. Significant linear relationships occurred in all regressions, but only marginal parts of the variance in ET were explained ( $r^2$ :  $< 0.001 - 0.007$ ,  $P < 0.05$ ).

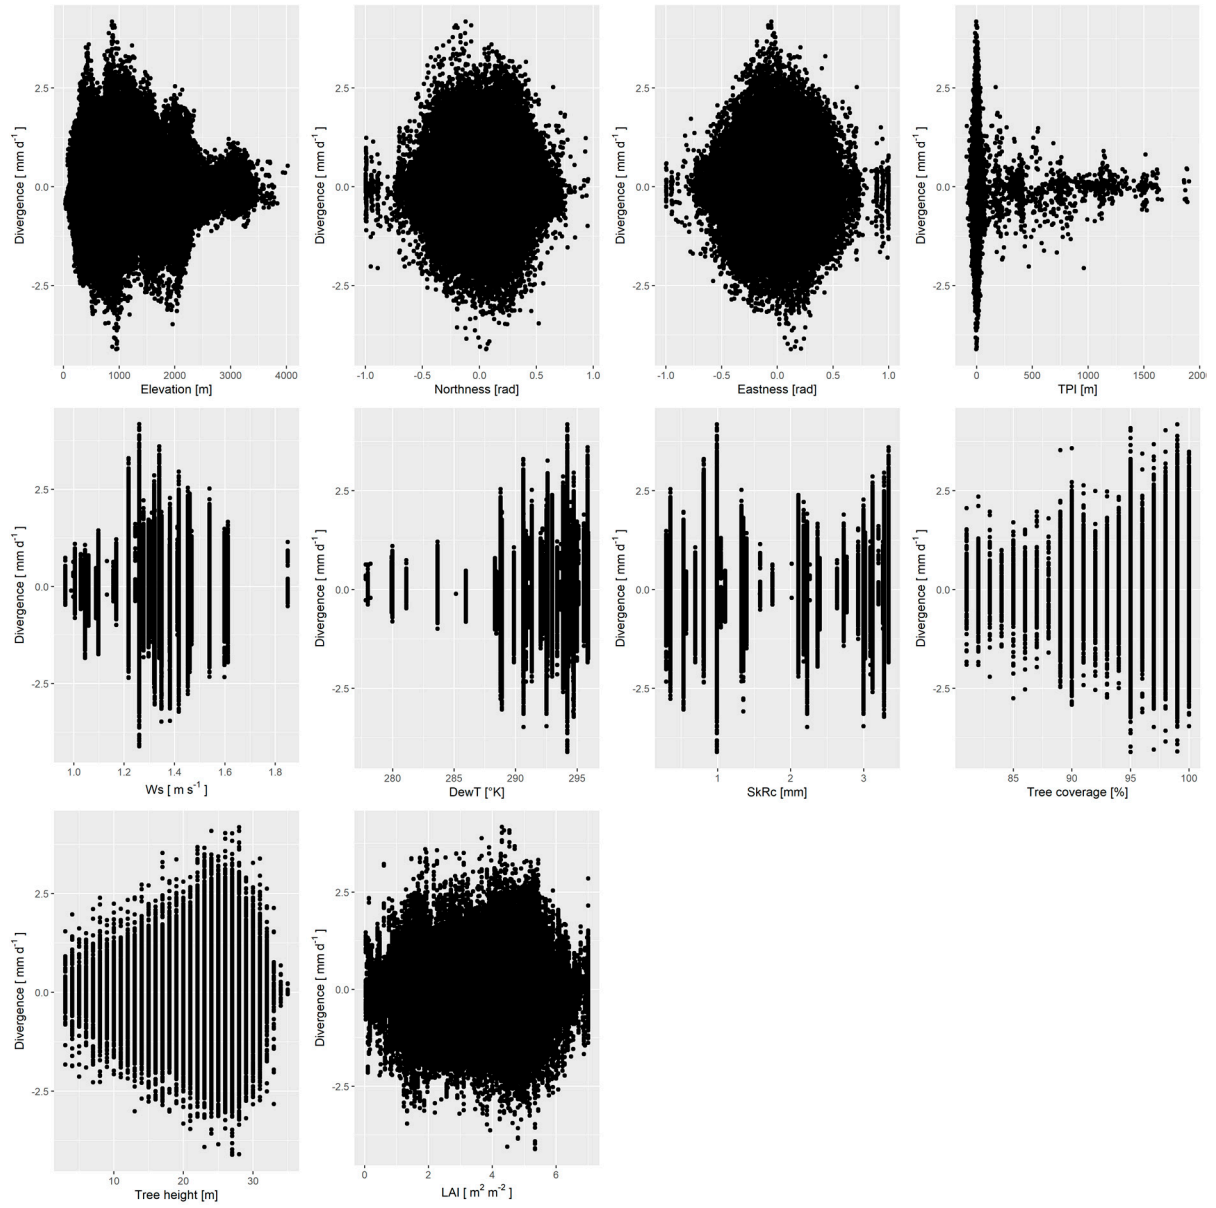

**Figure S4.** Relationship between divergencies (difference between observed vs predicted ET values for the testing or validation dataset) and predictor variables for D1: 06 February 2020.

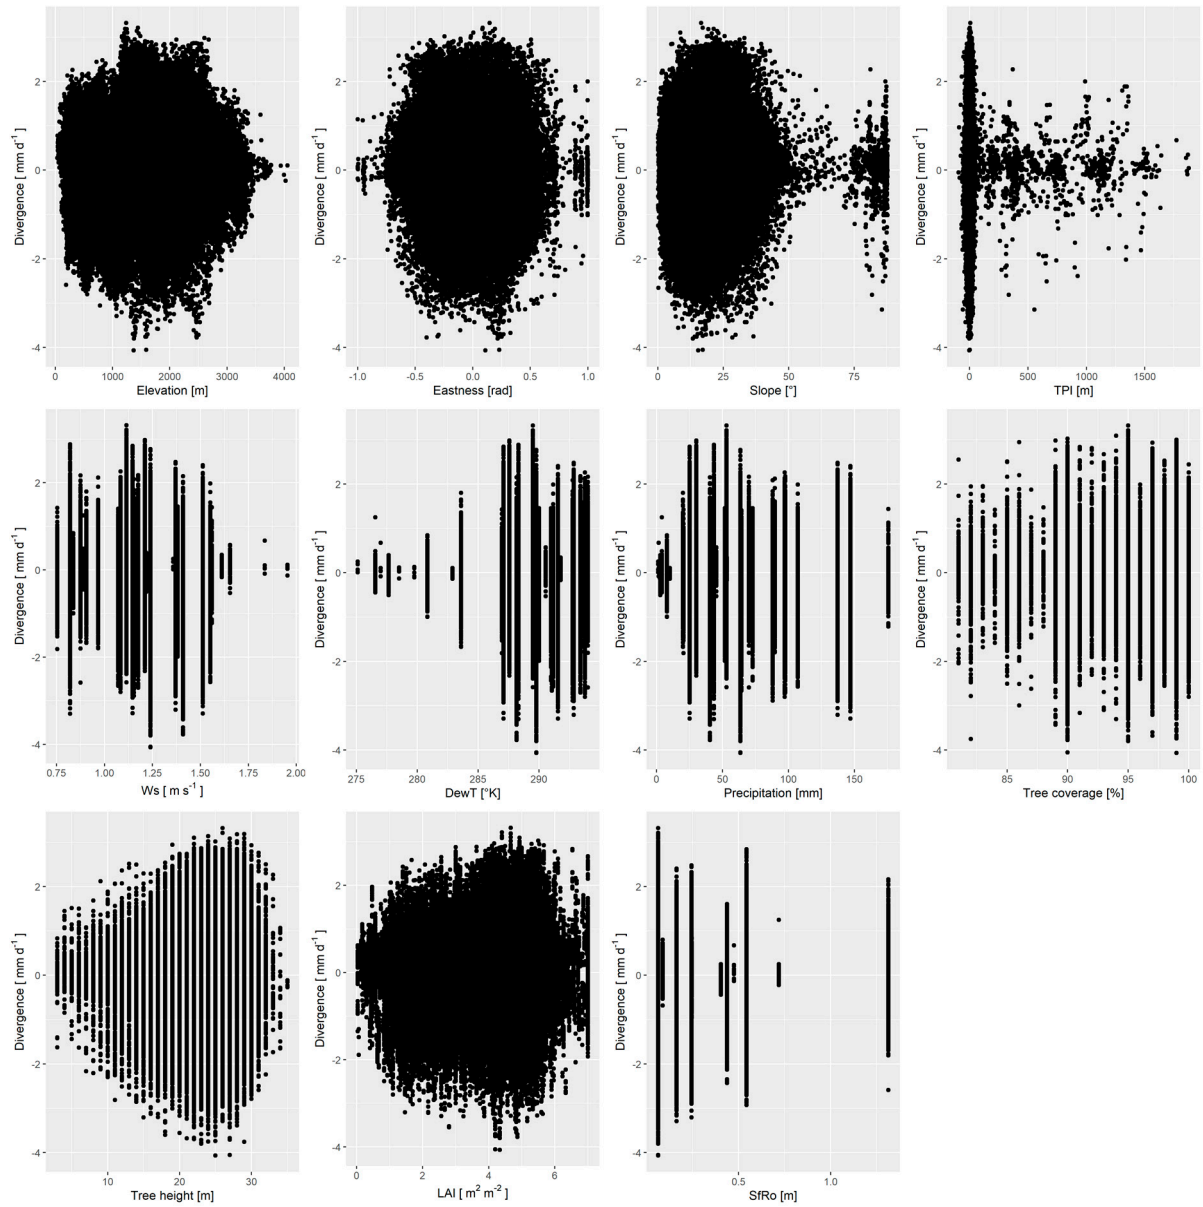

**Figure S5.** Relationship between divergencies (difference between observed vs predicted ET values for the testing or validation dataset) and predictor variables for D2: 08 August 2020.

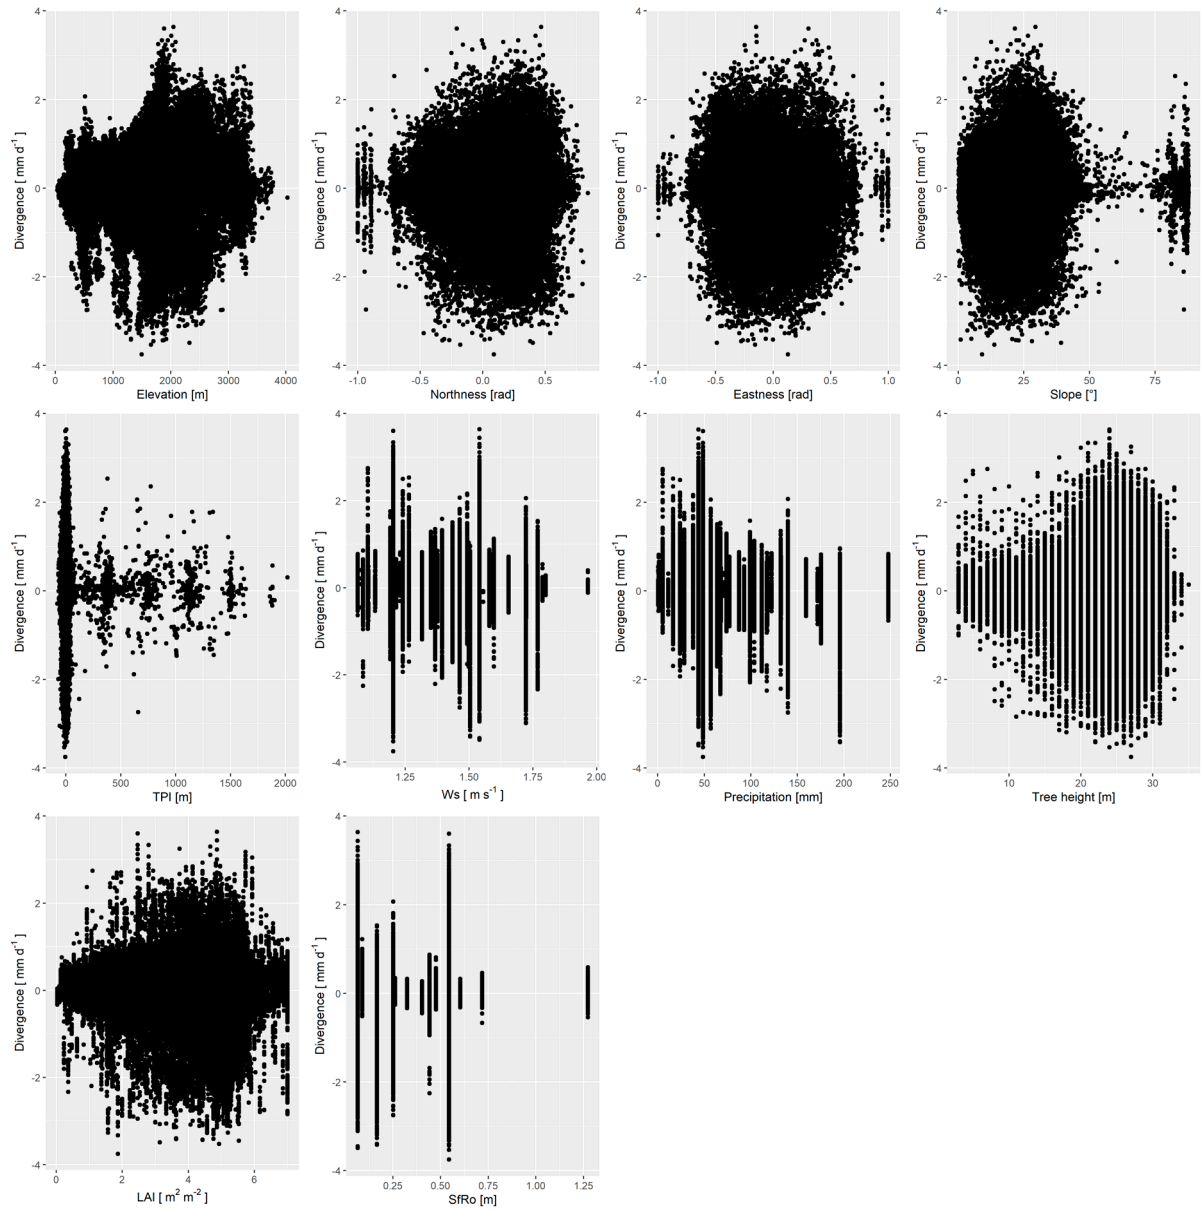

**Figure S6.** Relationship between divergencies (difference between observed vs predicted ET values for the testing or validation dataset) and predictor variables for D3: 10 October 2020.



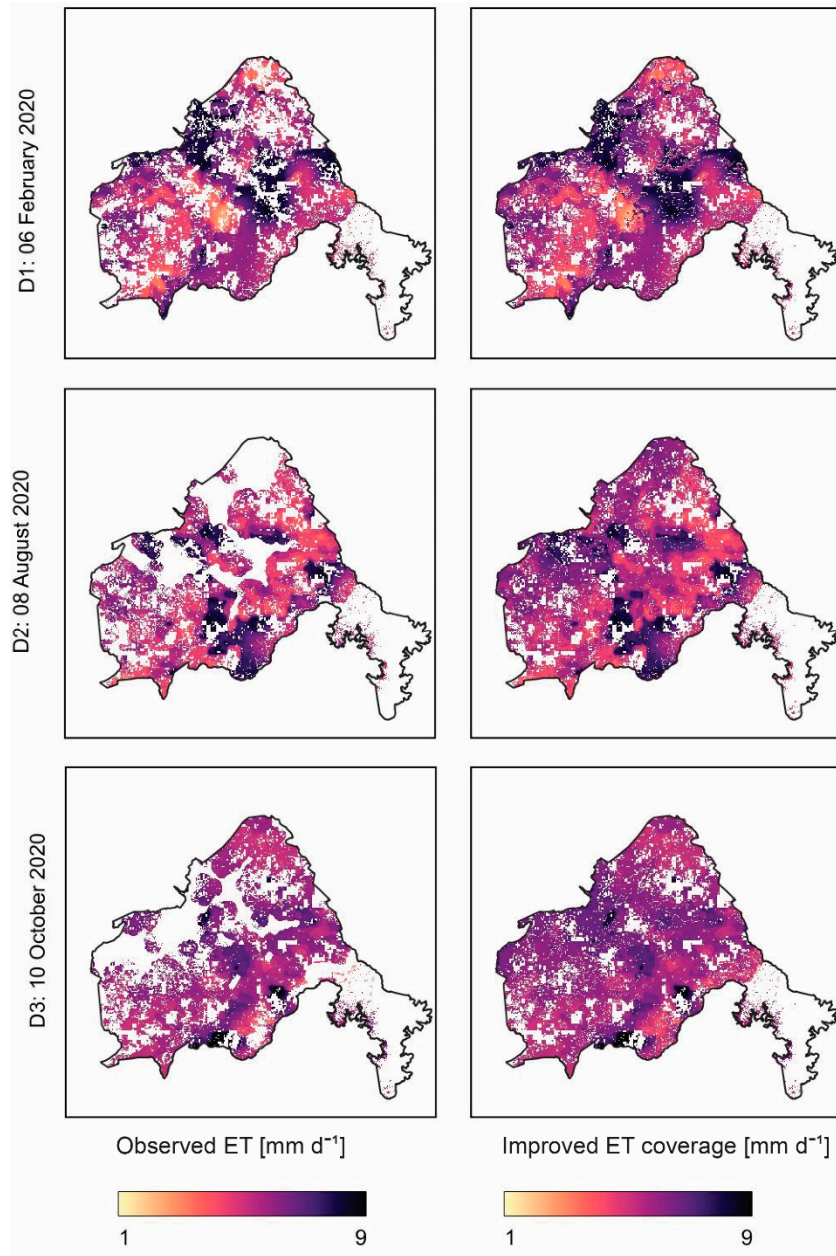

**Figure S7.** Prediction of ET based on models D1: 06 February 2020, D2: 08 August 2020 and D3: 10 October 2020 for observation gap filling across areas with > 80 % forest coverage in Cotacachi Cayapas National Park. White areas correspond to forest coverage < 80%, tussock vegetation or removed data (no data from predictor variables)
